# Supplementary material for: Synthesis of metal iodates from an energetic salt
Source: Royal Society of Chemistry journal article supplement (doi:10.1039/d0ra02250k), 2020-01-01
Supplement: d0ra02250k1.pdf [file d0ra02250k1.pdf]

## Synthesis of Metal Iodates from an Energetic Salt

I. Shancita<sup>1</sup>, Kelsea K. Miller<sup>1</sup>, Preston D. Silverstein<sup>2</sup>,

Joseph Kalman<sup>2</sup>, Michelle L. Pantoya<sup>1\*</sup>

<sup>1</sup> Department of Mechanical Engineering, Texas Tech University, Lubbock, TX 79409, USA

<sup>2</sup> Mechanical and Aerospace Engineering Department, California State University, Long Beach, CA 90840, USA

### Supplementary Information

#### Table of Contents

|                                                                                                                                  |        |
|----------------------------------------------------------------------------------------------------------------------------------|--------|
| S1. XRD spectra of product species from annealed AIH + CuO mixture at indicated<br>Temperatures.....                             | Page 2 |
| S2. XRD spectra of product species from annealed AIH + Fe <sub>2</sub> O <sub>3</sub> mixture at indicated<br>Temperatures ..... | Page 2 |
| S3. XRD spectra of product species from annealed AIH + Bi <sub>2</sub> O <sub>3</sub> mixture at indicated<br>Temperatures ..... | Page 3 |

---

\* Corresponding authors:

Email address: [michelle.pantoya@ttu.edu](mailto:michelle.pantoya@ttu.edu) (M.L. Pantoya)

### S1. XRD spectra of product species from annealed AIH + CuO mixture at indicated temperatures

Figure S1 (a) and (b) represent the PXRD scans of product species from annealed AIH + CuO at 360°C and 800°C respectively.

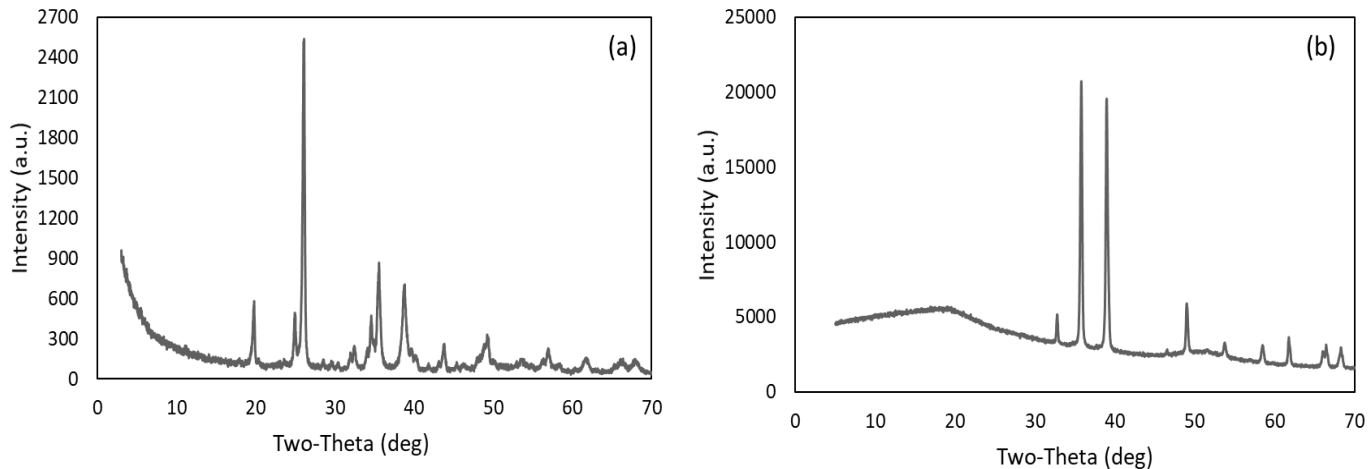

Figure S1. PXRD pattern of identified product species from AIH + CuO mixture annealed at (a) 360°C and (b) 800°C

### S2. XRD spectra of product species from annealed AIH + Fe<sub>2</sub>O<sub>3</sub> mixture at indicated temperatures

Figure S2 (a) and (b) represent the PXRD scans of product species from annealed AIH + Fe<sub>2</sub>O<sub>3</sub> at 360°C and 800°C respectively.

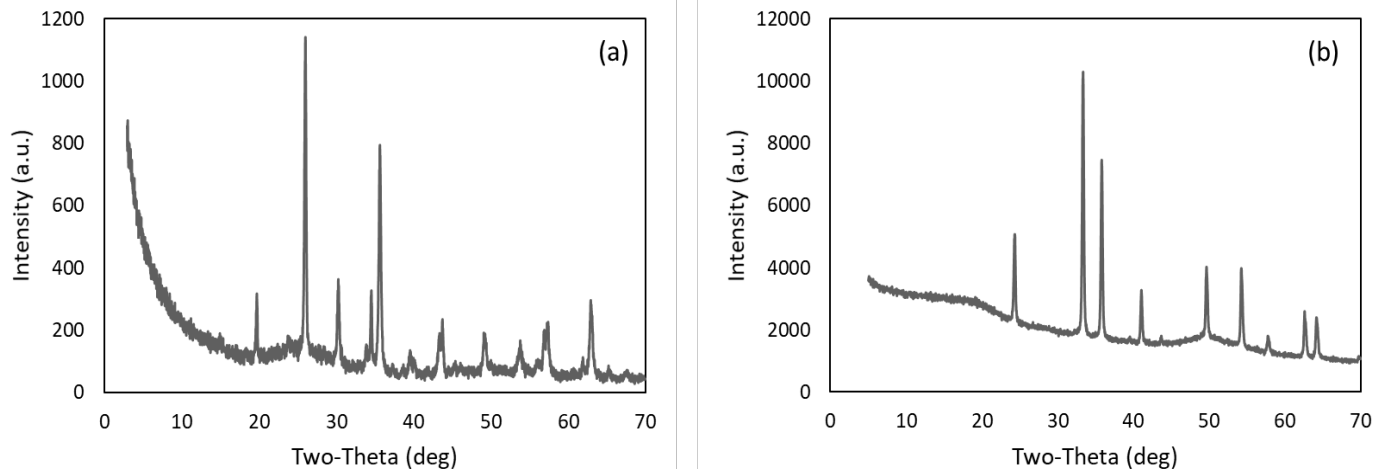

Figure S2. PXRD pattern of identified product species from AIH + Fe<sub>2</sub>O<sub>3</sub> mixture annealed at (a) 360°C and (b) 800°C

**S3. XRD spectra of product species from annealed AIH + Bi<sub>2</sub>O<sub>3</sub> mixture at indicated temperatures**

**Figure S3 (a) and (b)** represent the PXRD scans of product species from annealed AIH + Bi<sub>2</sub>O<sub>3</sub> at 420°C and 800°C respectively.

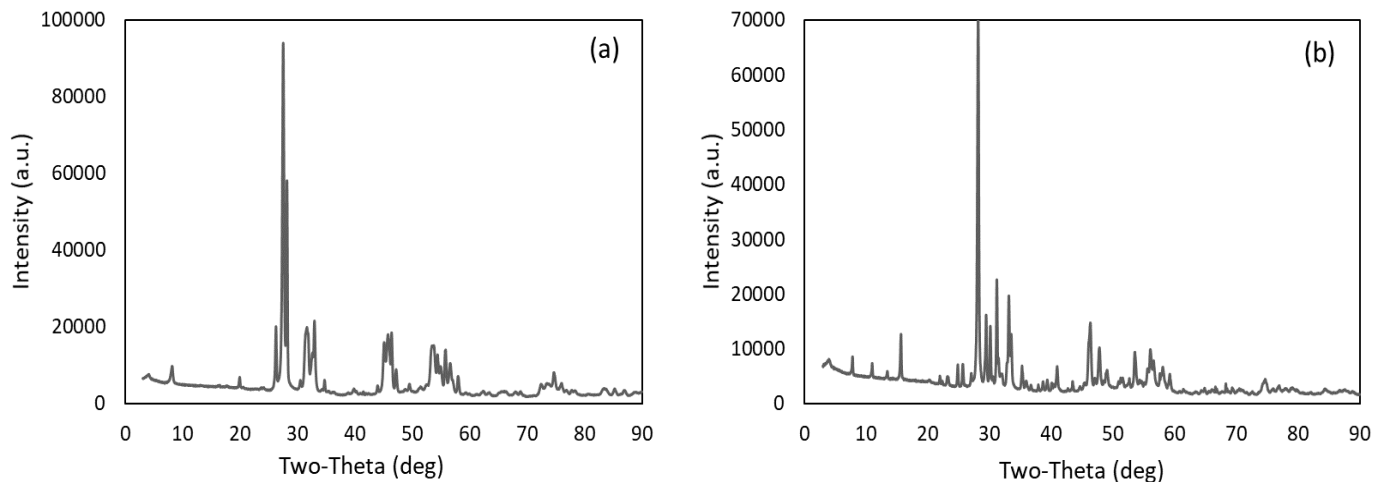

**Figure S3.** PXRD pattern of identified product species from AIH + Bi<sub>2</sub>O<sub>3</sub> mixture annealed at (a) 420°C and (b) 800°C
